# Supplementary material for: Resonance Rayleigh scattering detection of trace PDGF based on catalysis of an aptamer-modified nanogold probe in the Fehling reaction
Source: Royal Society of Chemistry journal article supplement (doi:10.1039/c4ra02857k), 2014-01-01
Supplement: c4ra02857k1.pdf [file c4ra02857k1.pdf]

## Resonance Rayleigh scattering detection of trace PDGF based on catalysis of aptamer-modified nanogold probe on the Fehling reaction

Yanghe Luo<sup>§</sup>, Xinghui Zhang<sup>§</sup>, Dongmei Yao, Guiqing Wen, Qingye Liu, Aihui Liang\*, Zhiliang Jiang\*

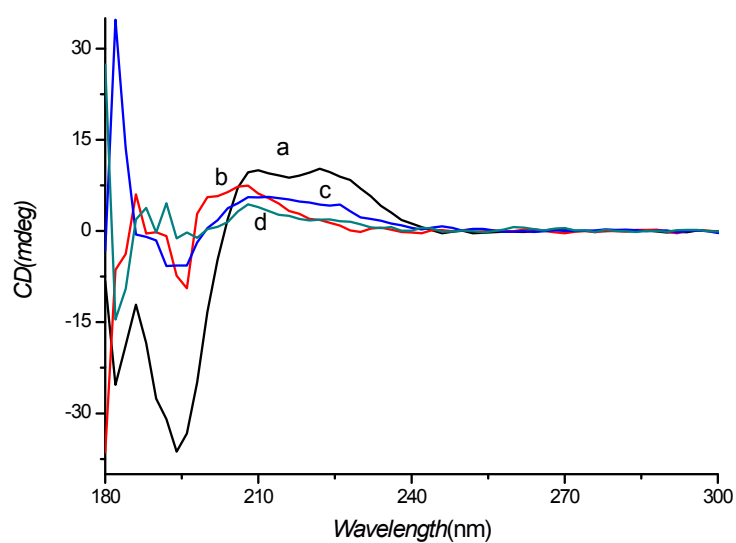

Figure 1S Circular dichroism spectra of the Apt-GN- PDGF-AA system  
a: 1.51  $\mu\text{g}/\text{mL}$  Apt-GN; b: 1.51  $\mu\text{g}/\text{mL}$  Apt-NG-6.67  $\mu\text{g}/\text{mL}$  BSA- pH7.2  $\text{Na}_2\text{HPO}_4\text{-NaH}_2\text{PO}_4$ -5.33  
mmol/L NaCl; c:b-6.67ng/mL PDGF-AA; d:b-26.67ng/mL PDGF-AA

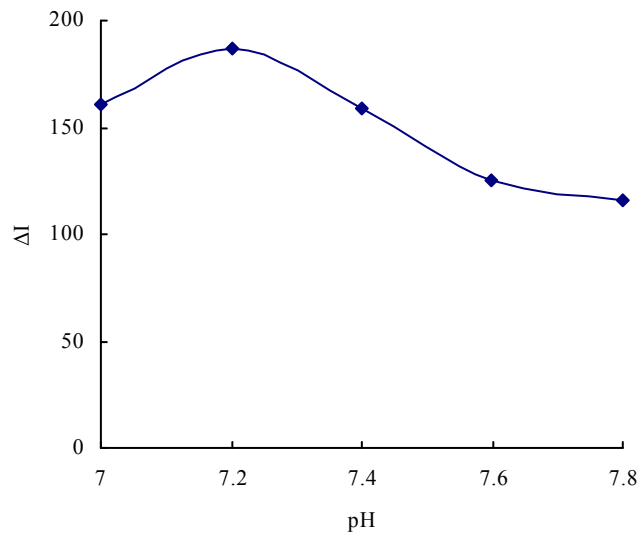

Figure 2S. Effect of pH value  
 $1.86\mu\text{g}\cdot\text{mL}^{-1}$  Apt-NG+ $6.67\mu\text{g}\cdot\text{mL}^{-1}$  BSA+ $20\text{ ng}\cdot\text{mL}^{-1}$  PDGF

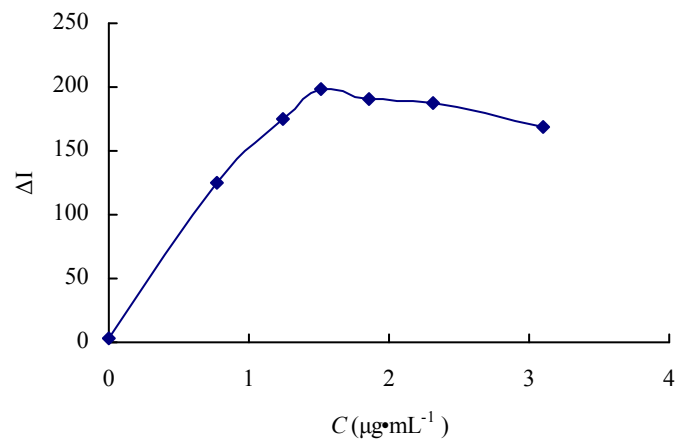

Figure 3S. Effect of Apt-NG concentration  
 $6.67\mu\text{g}\cdot\text{mL}^{-1}$  BSA-pH7.2  $\text{Na}_2\text{HPO}_4\text{-NaH}_2\text{PO}_4$ + $5.33\text{ mmol}\cdot\text{L}^{-1}$  NaCl+ $20\text{ ng}\cdot\text{mL}^{-1}$  PDGF

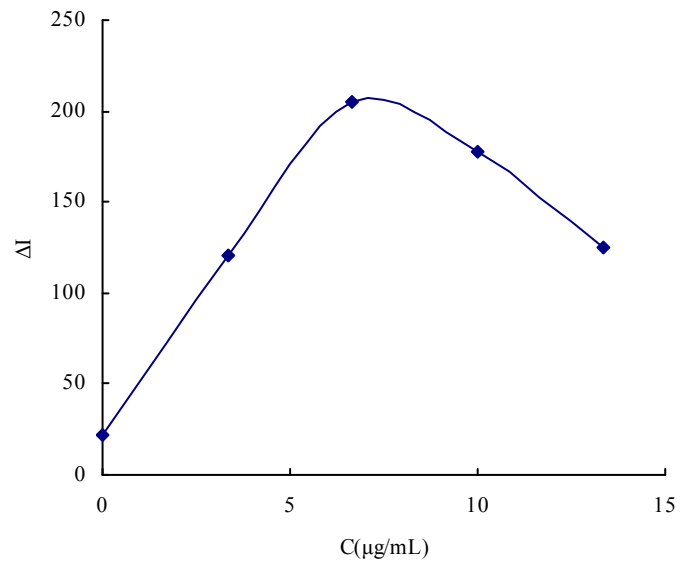

Figure 4S. Effect of BSA concentration  
 1.86  $\mu\text{g}\cdot\text{mL}^{-1}$  Apt-NG-pH 7.2  $\text{Na}_2\text{HPO}_4\text{-NaH}_2\text{PO}_4\text{-5.33 mmol}\cdot\text{L}^{-1}$   $\text{NaCl}$ -20  $\text{ng}\cdot\text{mL}^{-1}$  PDGF

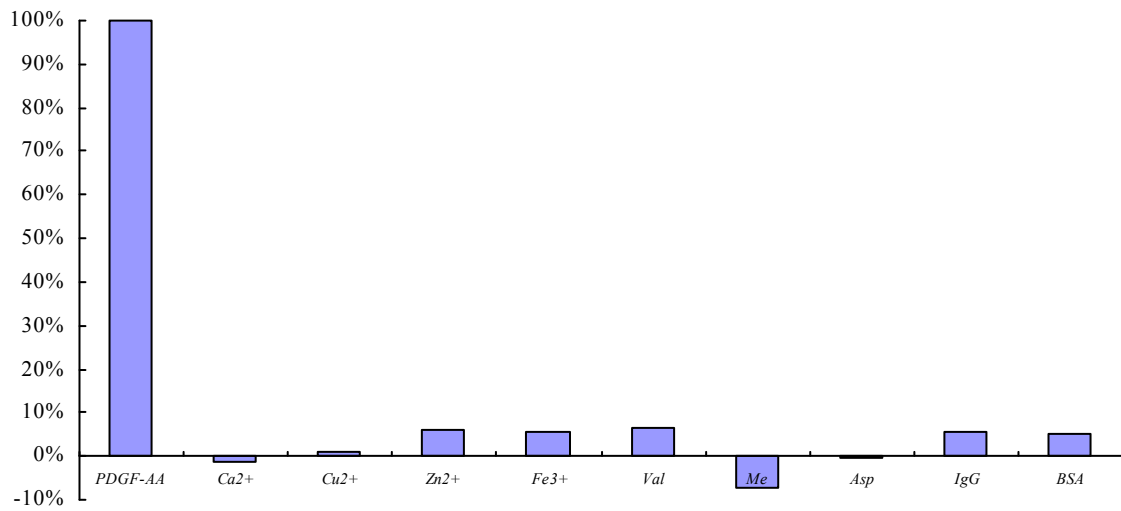

Figure 5S Effect of foreign substances

Table 1S Comparing of some methods for PDGF

| Method | Principle                                                                                                                                                                                                                                                    | LR<br>(nmol/L)                                    | DL<br>(pmol/L) | Comments                  | Ref.       |
|--------|--------------------------------------------------------------------------------------------------------------------------------------------------------------------------------------------------------------------------------------------------------------|---------------------------------------------------|----------------|---------------------------|------------|
| EC     | Upon addition of PDGF-BB, MB modified Apt is thought to fold into a configuration that forces the MB label into proximity with the electrode, leading to improved electron-transfer efficiency.                                                              | -                                                 | 50             | selective                 | [7]        |
| CL     | In the presence of PDGF-BB, the Apt can hybridize stably with the capture DNA to form a stem-loop structure leading to a strong CL.                                                                                                                          | 0.00005-0.5                                       | 0.01           | very sensitive and simple | [10]       |
| FR     | The fluorophore DMDAP was brought close to NG, thus its FR was quenched. Upon PDGF-AA binding, the conformation of Apt changed and therefore block of the DMDAP intercalation, making the FR restored.                                                       | 0-30                                              | 8              | sensitive and selective   | [3]        |
| FR     | Based on the release of an intercalating dye from the Apt stem structure during deformation when the Apt captures PDGF, result in FR quenching.                                                                                                              | -                                                 | 1              | sensitive and selective   | [16]       |
| CM     | Interparticle cross-linking of NG was induced by PDGF that acted as bridges linking Apt-NG together. But the cross-links of NG decreased in the presence of high-concentration PDGF due to repulsion and steric effects resulted from saturated NG surfaces. | PDGF-AA:25-75<br>PDGF-BB:35-150<br>PDGF-AB:15-100 | —              | simple                    | [9]        |
| Sensor | The Apt immobilized on a SGFET diamond surface, upon introduction of PDGF to the immobilized Apt, result in electrostatic changed.                                                                                                                           | -                                                 | -              | simple                    | [6]        |
| PRRS   | Apt-GN combined with PDGF-AA to form big cluster, and Apt-GN had catalysis of the Cu <sub>2</sub> O particle reaction.                                                                                                                                       | 0.0014-1.20<br>(0.03-26.67<br>ng/mL)              | 0.47           | Sensitive and simple      | This assay |

\*EC-electrochemistry, CL-chemiluminescence, CM-colorimetry, FR-fluorescence, MB-methylene blue, DMDAP-N,N-dimethyl-2,7-diazapyrenium.

Table 2S Analytical result of the PDGF samples

| Sample | Single value<br>(ng/mL)      | Average<br>(ng/mL) | Added PDGF-AA<br>(ng/mL) | Recovery<br>(%) | RSD<br>(%) | ELISA<br>(ng/mL) |
|--------|------------------------------|--------------------|--------------------------|-----------------|------------|------------------|
| 1      | 10.2, 9.00, 9.60, 10.8, 9.50 | 9.80               | 10.0                     | 98.1            | 6.9        | 9.95             |
| 2      | 9.80, 9.50, 9.30, 11.0, 9.30 | 9.80               | 10.0                     | 97.8            | 7.2        | 10.5             |
| 3      | 10.1, 9.60, 9.40, 9.60, 9.50 | 9.60               | 10.0                     | 96.3            | 3.1        | 9.68             |
